# Supplementary material
Source: PubMed Central journal article supplement (PMC553298)

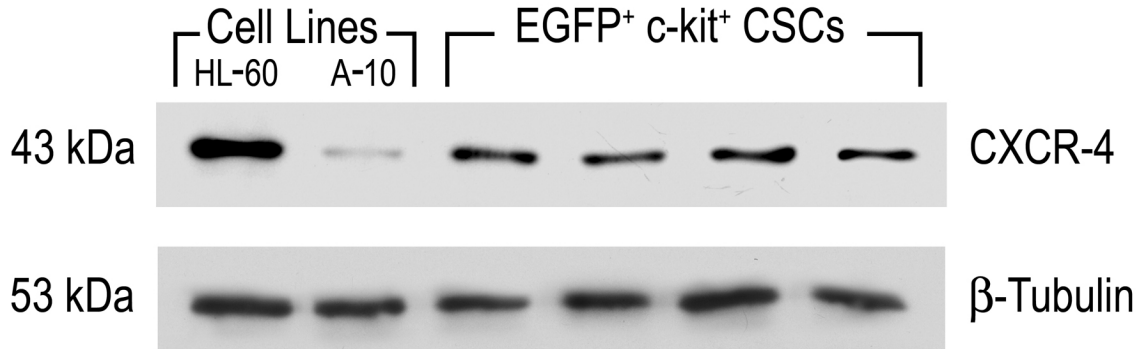

Supplement: pnas_102_10_3766__17.pdf [file pnas_102_10_3766__17.pdf]

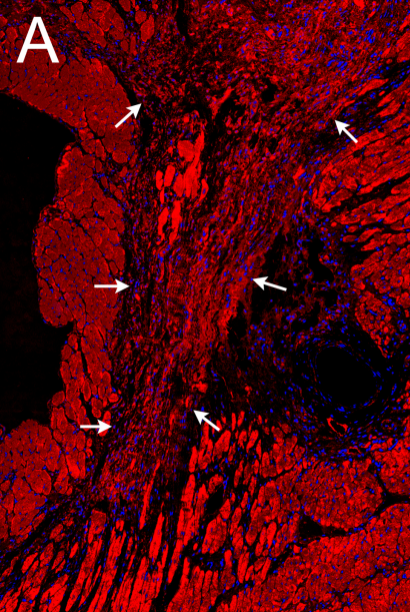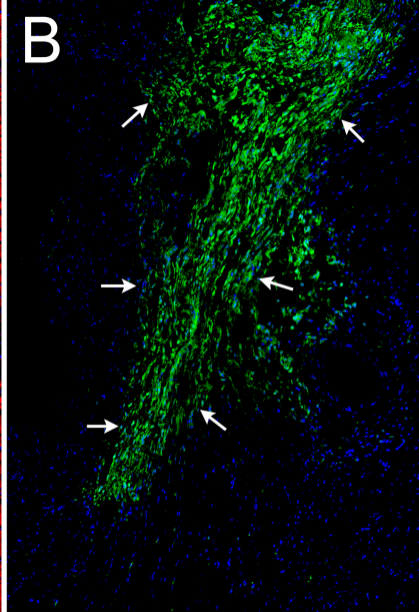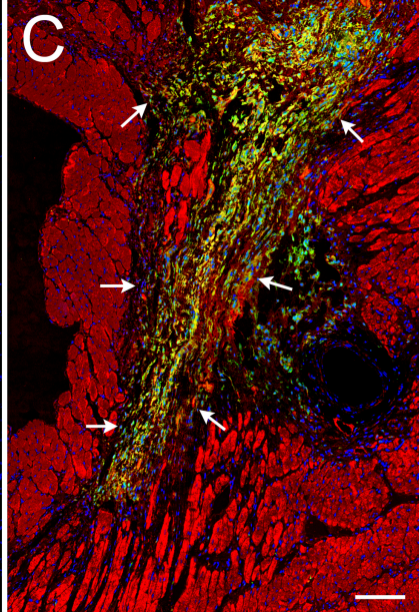

Supplement: pnas_102_10_3766__7.pdf [file pnas_102_10_3766__7.pdf]
